# Supplementary material for: Identification of the genome-wide TPS gene family of Cinnamomum camphora var. linaloolifera and functional validation of linalool
Source: Research Square preprint supplement (doi:10.21203/rs.3.rs-6432060/v1), 2025-05-12
Supplement: Supplementary file 1 [file 9275ffa471cb37a1df84e9bb.docx]

Supplementary Material

# Supplementary Figures and Tables

## Supplementary Figures


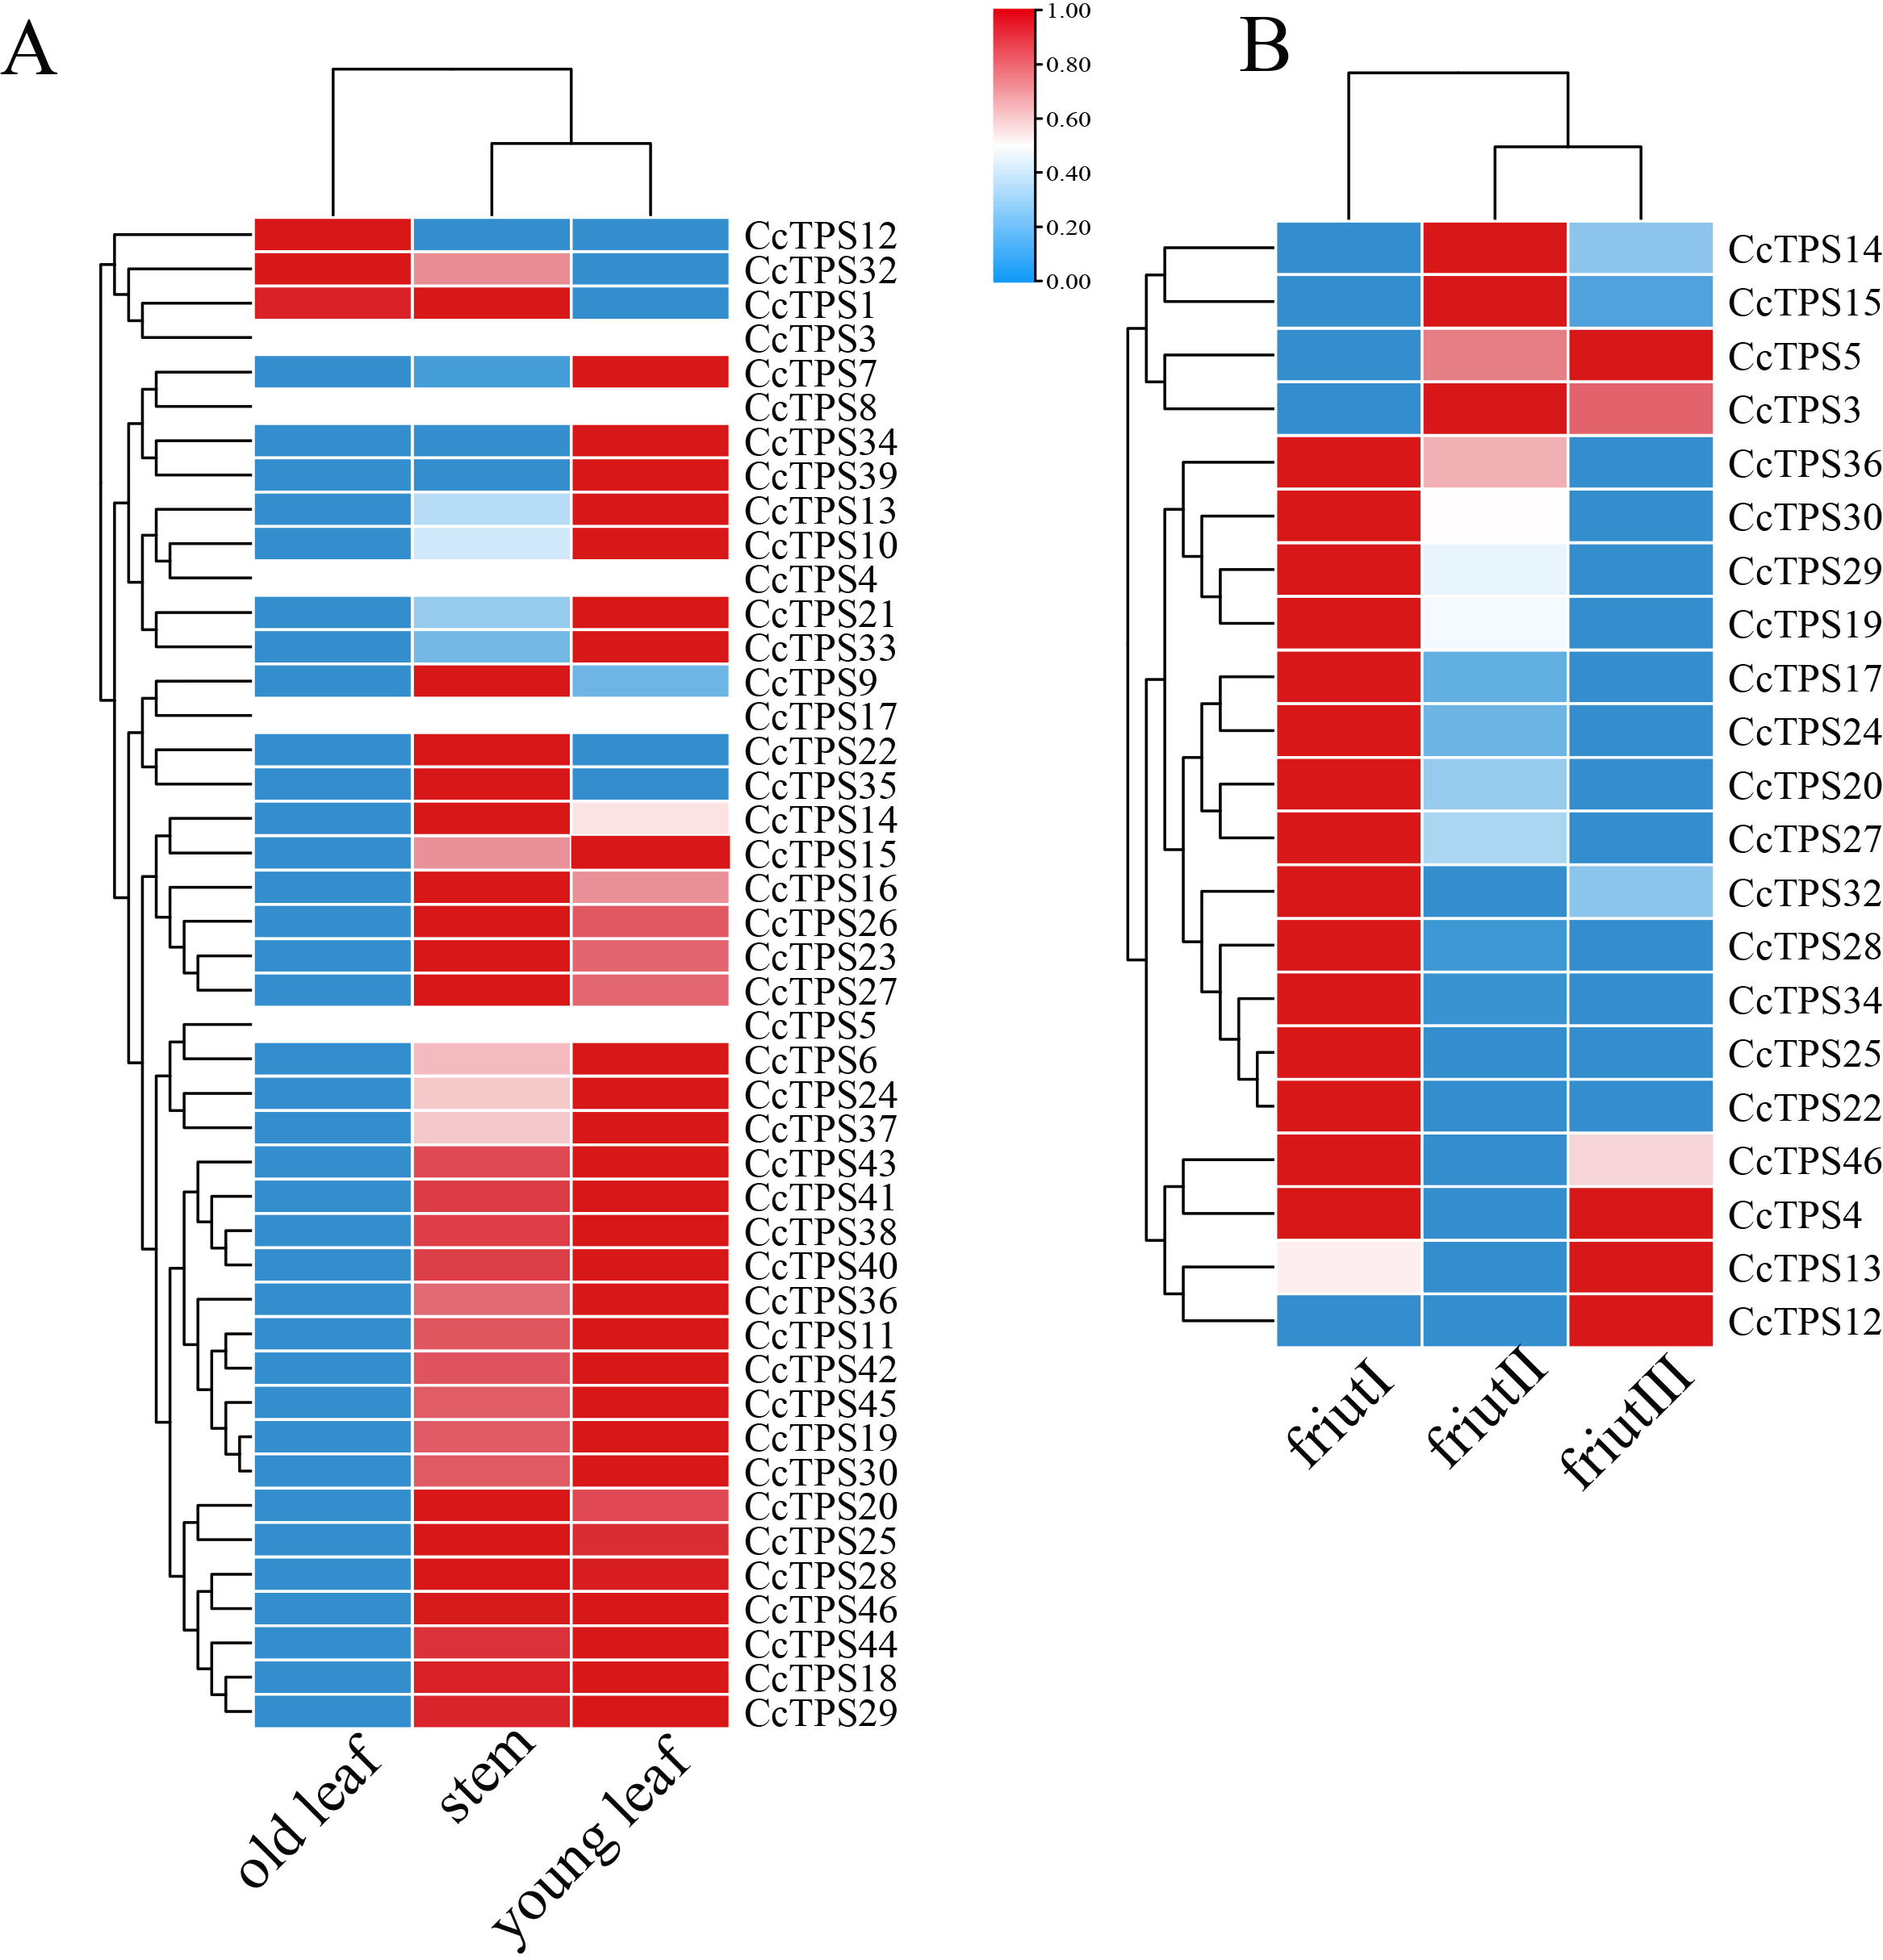


**Supplementary Figure S1.** Tissue-specific expression analysis of the *CcTPS* gene family. (**A**)Expression profiles of *CcTPS* genes in young leaves, old leaves, stems. (**B**) Expression profiles of *CcTPS* genes in young fruits (green fruit; fruit I), mature fruits (red fruit; fruit II), and late ripening fruits (purple fruit; fruit III).

## Supplementary Tables

**Supplementary Table 1.** Primer information involved in fluorescence quantitative qRT-PCR.

| Gene | Primer sequences(5'—3') |
| --- | --- |
| *CcTPS14*-F | CTGGAAATAATGGTGGCA |
| *CcTPS14*-R | CATGTACCTTGGAAGCTGAT |
| *CcTPS15*-F | TTTTCACATGAGCTTGCC |
| *CcTPS15*-R | TCCCATAAACATCGAAGATGTCATC |
| *CcTPS16*-F | GTTTTCCAATCAATACGAGC |
| *CcTPS16*-R | TCCAGAGTGAAGGTTATTATACTCG |
| *CcTPS32*-F | AACAGTGTCCTCCAAGTAGC |
| *CcTPS32*-R | TCTTCGTCCATGAACCGTTTAAACA |
| *CcEF1a*-F | TCCAAGGCACGGTATGAT |
| *CcEF1a*-R | CCTGAAGAGGGAGACGAA |

**Supplementary Table 2.** Functional annotation of *CcTPS* gene family.

| protein | Prediction | Group | protein | Prediction | Group |
| --- | --- | --- | --- | --- | --- |
| *CcTPS1* | Diterpene Synthase | TPS-c | *CcTPS24* | Sesquiterpene Synthase | TPS-a |
| *CcTPS2* | Monoterpene Synthase | TPS-b | *CcTPS25* | Sesquiterpene Synthase | TPS-a |
| *CcTPS3* | Monoterpene Synthase | TPS-b | *CcTPS26* | Sesquiterpene Synthase | TPS-a |
| *CcTPS4* | Monoterpene Synthase | TPS-b | *CcTPS27* | Sesquiterpene Synthase | TPS-a |
| *CcTPS5* | Monoterpene Synthase | TPS-b | *CcTPS28* | Sesquiterpene Synthase | TPS-a |
| *CcTPS6* | Sesquiterpene Synthase | TPS-a | *CcTPS29* | Sesquiterpene Synthase | TPS-a |
| *CcTPS7* | Sesquiterpene Synthase | TPS-a | *CcTPS30* | Monoterpene Synthase | TPS-b |
| *CcTPS8* | Sesquiterpene Synthase | TPS-a | *CcTPS31* | Monoterpene Synthase | TPS-b |
| *CcTPS9* | Sesquiterpene Synthase | TPS-a | *CcTPS32* | Monoterpene Synthase | TPS-g |
| *CcTPS10* | Sesquiterpene Synthase | TPS-a | *CcTPS33* | Monoterpene Synthase | TPS-b |
| *CcTPS11* | Monoterpene Synthase | TPS-b | *CcTPS34* | Diterpene Synthase | TPS-e/f |
| *CcTPS12* | Monoterpene Synthase | TPS-b | *CcTPS35* | Monoterpene Synthase | TPS-b |
| *CcTPS13* | Monoterpene Synthase | TPS-b | *CcTPS36* | Monoterpene Synthase | TPS-b |
| *CcTPS14* | Monoterpene Synthase | TPS-g | *CcTPS37* | Monoterpene Synthase | TPS-b |
| *CcTPS15* | Monoterpene Synthase | TPS-g | *CcTPS38* | Monoterpene Synthase | TPS-b |
| *CcTPS16* | Monoterpene Synthase | TPS-g | *CcTPS39* | Monoterpene Synthase | TPS-b |
| *CcTPS17* | Monoterpene Synthase | TPS-b | *CcTPS40* | Monoterpene Synthase | TPS-b |
| *CcTPS18* | Monoterpene Synthase | TPS-b | *CcTPS41* | Monoterpene Synthase | TPS-b |
| *CcTPS19* | Monoterpene Synthase | TPS-b | *CcTPS42* | Monoterpene Synthase | TPS-b |
| *CcTPS20* | Monoterpene Synthase | TPS-b | *CcTPS43* | Monoterpene Synthase | TPS-b |
| *CcTPS21* | Monoterpene Synthase | TPS-b | *CcTPS44* | Monoterpene Synthase | TPS-b |
| *CcTPS22* | Monoterpene Synthase | TPS-b | *CcTPS45* | Monoterpene Synthase | TPS-b |
| *CcTPS23* | Sesquiterpene Synthase | TPS-a | *CcTPS46* | Monoterpene Synthase | TPS-b |

**Supplementary Table** **3.** Assessment of Ka/Ks and divergence time of orthologous pairs between *C. camphora* var. *linalooliferaand* other five plants

| Species Gene ID1 | Species Gene ID2 | Ka | Ks | Ka/Ks | Time (Mya) |
| --- | --- | --- | --- | --- | --- |
| *C. camphora* var. *linaloolifera* vs *C. kanehirae* | | | | | |
| Maker00023025（*CcTPS23*） | CKAN_88237.1 | 0.2203 | 1.0407 | 0.2117 | 57.1798 |
| Maker00014805（*CcTPS26*） | CKAN_88238.1 | 0.9526 | 1.3032 | 0.731 | 71.6024 |
| Maker00014802（*CcTPS27*） | CKAN_88237.1 | 0.2203 | 1.0407 | 0.2117 | 57.1798 |
| Maker00014782（*CcTPS30*） | CKAN_88223.1 | 0.3997 | 1.2307 | 0.3248 | 67.621 |
| Maker00011988（*CcTPS21*） | CKAN_93218.1 | 0.0157 | 0.067 | 0.235 | 3.6808 |
| Maker00014789（*CcTPS28*） | CKAN_93508.1 | 0.3182 | 0.8863 | 0.359 | 48.6993 |
| Maker00015350（*CcTPS33*） | CKAN_93578.1 | 0.036 | 0.0467 | 0.7702 | 2.5664 |
| Maker00015608（*CcTPS38*） | CKAN_88332.1 | 0.0338 | 0.0706 | 0.4778 | 3.8813 |
| Maker00018262（*CcTPS40*） | CKAN_88356.1 | 0.1271 | 0.1618 | 0.7854 | 8.8903 |
| Maker00014318（*CcTPS42*） | CKAN_88356.1 | 0.7027 | 2.4897 | 0.2822 | 136.7957 |
| Maker00014305（*CcTPS41*） | CKAN_88332.1 | 0.0176 | 0.0788 | 0.2231 | 4.3304 |
| Maker00018262（*CcTPS40*） | CKAN_88332.1 | 0.0266 | 0.0952 | 0.2789 | 5.233 |
| Maker00024100（*CcTPS14*） | CKAN_88216.1 | 0.0271 | 0.0741 | 0.3657 | 4.0733 |
| Maker00024100（*CcTPS14*） | CKAN_93549.1 | 0.1303 | 1.1613 | 0.1122 | 63.8056 |
| *C. camphora* var. *linaloolifera* vs *M. biondii* | | | | | |
| Maker00011790(*CcTPS1*) | MBI40952 | 0.2099 | 1.141 | 0.184 | 62.6896 |
| Maker00014782(*CcTPS30*) | MBI26222 | 0.3924 | 1.5375 | 0.2552 | 84.4768 |
| Maker00015451(*CcTPS32*) | MBI35312 | 0.4422 | 2.6668 | 0.1658 | 146.5272 |
| Maker00014802(*CcTPS27*) | MBI20993 | 0.3767 | 1.7136 | 0.2198 | 94.1563 |
| Maker00014802(*CcTPS27*) | MBI33405 | 0.3163 | 1.3174 | 0.2401 | 72.3844 |
| Maker00014782(*CcTPS30*) | MBI43494 | 0.5585 | 2.8837 | 0.1937 | 158.4467 |
| Maker00017669(*CcTPS34*) | MBI23925 | 0.2999 | 1.2423 | 0.2414 | 68.257 |
| Maker00015605(*CcTPS36*) | MBI35312 | 0.4711 | 4.8305 | 0.0975 | 265.4109 |
| Maker00015608(*CcTPS38*) | MBI26222 | 0.5033 | 2.2783 | 0.2209 | 125.1839 |
| Maker00018575(*CcTPS39*) | MBI26236 | 0.4642 | 1.8839 | 0.2464 | 103.5128 |
| Maker00012602(*CcTPS3*) | MBI08574 | 0.3139 | 0.9806 | 0.3201 | 53.877 |
| Maker00024100(*CcTPS14*) | MBI35312 | 0.5279 | 2.2662 | 0.233 | 124.5152 |
| Maker00014809(*CcTPS17*) | MBI37936 | 0.5084 | 1.4538 | 0.3497 | 79.8776 |
| Maker00001539(*CcTPS18*) | MBI26229 | 0.4939 | 2.3833 | 0.2072 | 130.9479 |
| Maker00014818(*CcTPS16*) | MBI26222 | 0.6377 | 2.729 | 0.2337 | 149.9448 |
| *C. camphora* var. *linaloolifera* vs *C. salicifolius* | | | | | |
| Maker00017669(*CcTPS34*) | Cs01g01930 | 0.2543 | 0.9155 | 0.2777 | 50.3031 |
| Maker00011790(*CcTPS1*) | Cs06g00660 | 0.2411 | 1.0099 | 0.2387 | 55.4896 |
| Maker00014782(*CcTPS30*) | Cs08g00299 | 0.4224 | 1.5511 | 0.2723 | 85.224 |
| Maker00015451(*CcTPS32*) | Cs08g00301 | 0.2328 | 0.9378 | 0.2482 | 51.5251 |
| Maker00014782(*CcTPS30*) | Cs08g01847 | 0.2455 | 0.9534 | 0.2575 | 52.385 |
| Maker00014802(*CcTPS27*) | Cs08g01853 | 0.2299 | 1.0476 | 0.2195 | 57.5591 |
| Maker00018905(*CcTPS24*) | Cs08g01863 | 0.2388 | 1.0011 | 0.2385 | 55.0075 |
| Maker00001539(*CcTPS18*) | Cs08g01853 | 0.5463 | 2.534 | 0.2156 | 139.2332 |
| Maker00024100(*CcTPS14*) | Cs08g00301 | 0.2026 | 0.8868 | 0.2285 | 48.7257 |
| *C. camphora* var. *linaloolifera* vs *P. nigrum* | | | | | |
| Maker00011790(*CcTPS1*) | Pn14.77 | 0.2852 | 3.8087 | 0.0749 | 209.2704 |
| Maker00023025(*CcTPS23*) | Pn24.76 | 0.4211 | 2.898 | 0.1453 | 159.2305 |
| Maker00014802(*CcTPS27*) | Pn16.1023 | 0.4477 | 2.8723 | 0.1559 | 157.8189 |
| Maker00015451(*CcTPS32*) | Pn7.994 | 0.6549 | 3.6313 | 0.1804 | 199.5246 |
| *C. camphora* var. *linaloolifera* vs *A. fimbriata* | | | | | |
| Maker00014809(*CcTPS17*) | KAG9454290.1 | 0.8907 | 3.4404 | 0.2589 | 189.0323 |

**Supplementary Table 4**. The expression *CcTPS* genefamily expression profile.

| gene name | old leaf | steam | young leaf | gene name | old leaf | steam | young leaf | gene name | friutⅠ | friutⅡ | friutⅢ |
| --- | --- | --- | --- | --- | --- | --- | --- | --- | --- | --- | --- |
| *CcTPS1* | 0.4 | 0.41 | 0.06 | *CcTPS24* | 0 | 0.41 | 0.77 | *CcTPS14* | 0 | 1.22 | 0.23 |
| *CcTPS3* | 0 | 0 | 0 | *CcTPS25* | 0 | 31.81 | 24.6 | *CcTPS46* | 0.07 | 0 | 0.04 |
| *CcTPS4* | 0 | 0 | 0 | *CcTPS26* | 0 | 0.72 | 0.56 | *CcTPS15* | 0 | 0.21 | 0.02 |
| *CcTPS5* | 0 | 0 | 0 | *CcTPS27* | 0.08 | 38.6 | 17.65 | *CcTPS36* | 0.12 | 0.08 | 0.01 |
| *CcTPS6* | 0 | 1.56 | 3.5 | *CcTPS28* | 0.01 | 9.96 | 9.42 | *CcTPS20* | 5.01 | 1.45 | 0.72 |
| *CcTPS7* | 0 | 0.04 | 0.71 | *CcTPS29* | 0.14 | 60.03 | 75.04 | *CcTPS29* | 5.89 | 3.61 | 2.29 |
| *CcTPS8* | 0 | 0 | 0 | *CcTPS30* | 0.11 | 3.17 | 4.58 | *CcTPS34* | 30.16 | 0.11 | 0.02 |
| *CcTPS9* | 0 | 0.04 | 0.01 | *CcTPS32* | 7.21 | 4.6 | 1.12 | *CcTPS25* | 0.03 | 0.02 | 0.02 |
| *CcTPS10* | 0 | 0.38 | 1.23 | *CcTPS33* | 0 | 0.03 | 0.14 | *CcTPS19* | 0.63 | 0.31 | 0.07 |
| *CcTPS11* | 0 | 14.88 | 27.07 | *CcTPS34* | 0.02 | 0.03 | 1.25 | *CcTPS13* | 10.36 | 10.01 | 10.68 |
| *CcTPS12* | 41.97 | 0.1 | 0.13 | *CcTPS35* | 0 | 0.01 | 0 | *CcTPS17* | 9.99 | 0.46 | 0 |
| *CcTPS13* | 0.02 | 0.09 | 0.22 | *CcTPS36* | 0.01 | 2.48 | 3.89 | *CcTPS5* | 0.11 | 0.61 | 0.83 |
| *CcTPS14* | 0.01 | 4.9 | 1.69 | *CcTPS37* | 0 | 0.01 | 0.02 | *CcTPS28* | 1.69 | 0.23 | 0.18 |
| *CcTPS15* | 0.04 | 5.93 | 1.77 | *CcTPS38* | 0.03 | 87.91 | 161.34 | *CcTPS24* | 14.25 | 0.97 | 0.26 |
| *CcTPS16* | 0.02 | 20.97 | 7.97 | *CcTPS39* | 0 | 0 | 0.02 | *CcTPS27* | 7.51 | 2.05 | 0.84 |
| *CcTPS17* | 0 | 0 | 0 | *CcTPS40* | 0.09 | 91.97 | 169.56 | *CcTPS3* | 0.06 | 0.54 | 0.43 |
| *CcTPS18* | 0.16 | 8.31 | 9.08 | *CcTPS41* | 0.05 | 149.91 | 281.84 | *CcTPS12* | 0 | 0 | 0.01 |
| *CcTPS19* | 0.02 | 4.9 | 7.72 | *CcTPS42* | 0.01 | 11.87 | 20.49 | *CcTPS22* | 0.06 | 0 | 0 |
| *CcTPS20* | 0.02 | 3.85 | 2.9 | *CcTPS43* | 0.07 | 55.96 | 110 | *CcTPS32* | 6.18 | 2.26 | 2.99 |
| *CcTPS21* | 0 | 0.02 | 0.06 | *CcTPS44* | 0.03 | 326.79 | 564.12 | *CcTPS30* | 0.09 | 0.06 | 0.03 |
| *CcTPS22* | 0 | 0.04 | 0 | *CcTPS45* | 0 | 14.49 | 27.82 | *CcTPS4* | 0.04 | 0 | 0.04 |
| *CcTPS23* | 0.01 | 2.45 | 1.68 | *CcTPS46* | 0 | 1.63 | 1.67 |  |  |  |  |

**Supplementary Table 5.** *CcTPS14* in vitro enzyme activity detection.

| No | Retention time | Compound name | Molecular Formula | CAS number | Matching% | 1 | 2 | 3 | CK |
| --- | --- | --- | --- | --- | --- | --- | --- | --- | --- |
| 1 | 6.134 | 3-Pentanone | C5H10O | 96-22-0 | 70.3 | 0.00 | 0.00 | 0.12 | 0.088 |
| 2 | 6.615 | Butanoic acid, methyl ester | C5H10O2 | 623-42-7 | 81.9 | 0.00 | 0.00 | 0.17 | 0.089 |
| 3 | 8.054 | Butanoic acid, 2-methyl-, methyl ester | C6H12O2 | 868-57-5 | 80.5 | 0.00 | 0.11 | 0.12 | 0.00 |
| 4 | 8.797 | 3-Pentanol, 2,4-dimethyl- | C7H16O | 600-36-2 | 81.3 | 1.68 | 0.00 | 0.00 | 0.00 |
| 5 | 9.048 | 2-Acetyl-2-methyltetrahydrofuran | C7H12O2 | 32318-87-9 | 81.9 | 0.00 | 0.074 | 0.00 | 0.00 |
| 6 | 10.002 | Propanal dibenzyl acetal | C17H20O2 | 1000431-61-2 | 72.1 | 0.00 | 0.015 | 0.00 | 0.15 |
| 7 | 10.104 | Furfural | C5H4O2 | 1998/1/1 | 79.9 | 0.045 | 0.00 | 0.00 | 0.00 |
| 8 | 11.560 | Benzene, 1,3-dimethyl- | C8H10 | 108-38-3 | 98.3 | 3.63 | 2.48 | 2.51 | 0.00 |
| 9 | 12.496 | Isomaltol | C6H6O3 | 3420-59-5 | 73.6 | 0.00 | 0.00 | 0.11 | 1.85 |
| 10 | 12.930 | Hexanal, 5-methyl- | C7H14O | 1860-39-5 | 87.1 | 0.063 | 0.14 | 0.17 | 0.066 |
| 11 | 13.555 | Di-n-propyl ether | C6H14O | 111-43-3 | 75.5 | 0.047 | 0.00 | 0.042 | 0.00 |
| 12 | 13.889 | Hexanoic acid, methyl ester | C7H14O2 | 106-70-7 | 94.4 | 0.36 | 0.00 | 0.47 | 0.84 |
| 13 | 14.574 | (1R)-2,6,6-Trimethylbicyclo[3.1.1]hept-2-ene | C10H16 | 7785-70-8 | 94.3 | 0.28 | 0.00 | 0.028 | 0.00 |
| 14 | 15.583 | Benzene, propyl- | C9H12 | 103-65-1 | 90.9 | 0.066 | 0.039 | 0.000 | 0.15 |
| 15 | 15.784 | Heptane, 3-ethyl-2-methyl- | C10H22 | 14676-29-0 | 78.9 | 0.000 | 0.050 | 0.046 | 0.00 |
| 16 | 15.935 | Benzene, 1-ethyl-4-methyl- | C9H12 | 622-96-8 | 83.9 | 0.14 | 0.00 | 0.00 | 0.00 |
| 17 | 16.258 | 1,3-Benzenediol, monobenzoate | C13H10O3 | 136-36-7 | 82.3 | 0.082 | 0.24 | 0.00 | 0.00 |
| 18 | 16.560 | .beta.-Phellandrene | C10H16 | 555-10-2 | 95.3 | 0.20 | 0.051 | 0.00 | 0.13 |
| 19 | 16.828 | Ethyl orthoformate | C7H16O3 | 122-51-0 | 85.4 | 0.00 | 3.34 | 0.00 | 0.00 |
| 20 | 17.043 | 5-Hepten-2-one, 6-methyl- | C8H14O | 110-93-0 | 95.9 | 0.75 | 1.05 | 1.00 | 0.00 |
| 21 | 17.277 | .beta.-Myrcene | C10H16 | 123-35-3 | 95.4 | 1.42 | 1.50 | 1.62 | 0.013 |
| 22 | 17.579 | Mesitylene | C9H12 | 108-67-8 | 94.8 | 0.28 | 0.00 | 0.00 | 0.00 |
| 23 | 17.978 | Octanal | C8H16O | 124-13-0 | 97.3 | 1.14 | 0.51 | 0.53 | 0.81 |
| 24 | 18.217 | .alpha.-Phellandrene | C10H16 | 99-83-2 | 88.6 | 0.00 | 0.062 | 0.061 | 2.93 |
| 25 | 18.811 | 2-Propanol, 1,1'-oxybis- | C6H14O3 | 110-98-5 | 94.7 | 1.10 | 1.40 | 1.38 | 0.00 |
| 26 | 18.860 | Benzene, 1,2,3-trimethyl- | C9H12 | 526-73-8 | 76.8 | 0.095 | 0.068 | 0.00 | 0.11 |
| 27 | 19.077 | 1-Hexanol, 2-ethyl- | C8H18O | 104-76-7 | 98.2 | 2.28 | 0.80 | 0.71 | 0.13 |
| 28 | 19.228 | D-Limonene | C10H16 | 5989-27-5 | 97.5 | 2.29 | 0.94 | 0.99 | 0.39 |
| 29 | 19.405 | Bicyclo[3.1.1]hept-2-ene, 3,6,6-trimethyl- | C10H16 | 4889-83-2 | 90.1 | 0.21 | 0.59 | 0.65 | 1.22 |
| 30 | 19.500 | 1,2-Propanediol, 1-phenyl- | C9H12O2 | 1855-09-0 | 79.4 | 0.46 | 0.00 | 0.00 | 0.52 |
| 31 | 19.799 | 1-Propanol, 2-(2-hydroxypropoxy)- | C6H14O3 | 106-62-7 | 94.6 | 0.92 | 1.19 | 0.85 | 0.35 |
| 32 | 19.911 | 3-Carene | C10H16 | 13466-78-9 | 95.4 | 0.63 | 0.86 | 0.96 | 1.20 |
| 33 | 20.143 | Benzene, 1-methyl-4-propyl- | C10H14 | 1074-55-1 | 89.1 | 0.11 | 0.00 | 0.045 | 1.62 |
| 34 | 20.406 | Ethanone, 1-(4-methylphenyl)- | C9H10O | 122-00-9 | 83.8 | 0.14 | 0.00 | 0.00 | 0.026 |
| 35 | 20.481 | .alpha.-Phellandrene | C10H16 | 99-83-2 | 90.9 | 0.056 | 0.022 | 0.055 | 0.084 |
| 36 | 20.855 | Acetophenone | C8H8O | 98-86-2 | 94.8 | 0.42 | 0.00 | 1.65 | 0.00 |
| 37 | 20.940 | 1-Octanol | C8H18O | 111-87-5 | 92.1 | 0.23 | 0.19 | 0.24 | 0.29 |
| 38 | 21.128 | 4'-Butoxy-2'-methylacetophenone | C13H18O2 | 1000195-98-2 | 78.4 | 0.00 | 0.021 | 0.00 | 0.00 |
| 39 | 21.313 | 1-Pentanone, 1-(4-methylphenyl)- | C12H16O | 1671-77-8 | 81.5 | 0.095 | 0.00 | 0.00 | 0.00 |
| 40 | 21.638 | (+)-4-Carene | C10H16 | 29050-33-7 | 96.0 | 0.70 | 0.36 | 0.31 | 0.45 |
| 41 | 21.827 | Benzene, 4-ethenyl-1,2-dimethyl- | C10H12 | 27831-13-6 | 82.2 | 0.066 | 0.00 | 0.00 | 0.021 |
| 42 | 22.138 | Linalool | C10H18O | 78-70-6 | 99.1 | 21.69 | 31.92 | 33.13 | 0.00 |
| 43 | 22.325 | Nonanal | C9H18O | 124-19-6 | 99.3 | 4.55 | 4.63 | 4.92 | 9.98 |
| 44 | 22.657 | Hexanoic acid, 2-ethyl- | C8H16O2 | 149-57-5 | 85.6 | 0.00 | 0.00 | 0.23 | 0.00 |
| 45 | 22.857 | Benzenemethanol, .alpha.-methyl- | C8H10O | 98-85-1 | 91.3 | 0.11 | 0.085 | 0.062 | 0.00 |
| 46 | 22.994 | Octanoic acid, methyl ester | C9H18O2 | 111-11-5 | 90.1 | 0.47 | 0.76 | 0.68 | 0.11 |
| 47 | 23.308 | Linalool, methy lether | C11H20O | 1000352-63-6 | 98.1 | 14.43 | 21.32 | 20.61 | 14.39 |
| 48 | 23.709 | Alloocimene | C10H16 | 673-84-7 | 83.2 | 0.00 | 0.00 | 0.00 | 0.057 |
| 49 | 23.858 | 1-Octen-3-one | C8H14O | 4312-99-6 | 75.3 | 0.18 | 0.00 | 0.019 | 0.00 |
| 50 | 24.139 | (+)-Citronellal | C10H18O | 2385-77-5 | 88.3 | 0.22 | 0.21 | 0.16 | 0.10 |
| 51 | 24.548 | Acetic acid, phenylmethyl ester | C9H10O2 | 140-11-4 | 89.0 | 0.15 | 0.00 | 0.00 | 0.00 |
| 52 | 24.667 | Benzaldehyde, 3-ethyl- | C9H10O | 34246-54-3 | 95.5 | 0.45 | 0.00 | 0.00 | 0.00 |
| 53 | 24.767 | 2-Decen-1-ol, (E)- | C10H20O | 18409-18-2 | 77.3 | 0.26 | 0.12 | 0.00 | 0.13 |
| 54 | 25.131 | 1-Propanone, 1-(1-cyclohexen-1-yl)- | C9H14O | 1655-03-4 | 73.6 | 0.057 | 0.028 | 0.029 | 0.024 |
| 55 | 25.313 | Benzaldehyde, 4-ethyl- | C9H10O | 4748-78-1 | 90.3 | 0.15 | 0.00 | 0.00 | 0.00 |
| 56 | 25.470 | Ethanone, 1-(2-methylphenyl)- | C9H10O | 577-16-2 | 89.1 | 0.083 | 0.00 | 0.00 | 0.00 |
| 57 | 25.550 | Naphthalene | C10H8 | 91-20-3 | 93.7 | 0.69 | 0.00 | 0.011 | 0.074 |
| 58 | 25.707 | Nerol, methyl ether | C11H20O | 1000352-64-1 | 90.2 | 0.45 | 0.41 | 0.10 | 0.52 |
| 59 | 25.760 | Dodecane | C12H26 | 112-40-3 | 91.1 | 0.55 | 0.053 | 0.079 | 0.00 |
| 60 | 25.777 | .alpha.-Terpineol | C10H18O | 98-55-5 | 94.2 | 0.48 | 0.76 | 0.79 | 0.72 |
| 61 | 26.005 | Decanal | C10H20O | 112-31-2 | 98.8 | 0.92 | 0.33 | 0.33 | 0.56 |
| 62 | 26.181 | Butanoic acid, decyl ester | C14H28O2 | 5454/9/1 | 81.5 | 0.76 | 0.00 | 0.00 | 0.41 |
| 63 | 26.462 | Geranyl methyl ether | C11H20O | 2565-82-4 | 99.0 | 9.26 | 13.53 | 13.72 | 9.23 |
| 64 | 26.566 | .alpha.-Terpinene | C10H16 | 99-86-5 | 80.7 | 0.52 | 2.95 | 2.47 | 1.64 |
| 65 | 26.692 | Nerol | C10H18O | 106-25-2 | 93.7 | 0.77 | 0.15 | 0.15 | 1.12 |
| 66 | 27.111 | Neral | C10H16O | 106-26-3 | 97.1 | 0.66 | 0.78 | 0.97 | 0.72 |
| 67 | 27.447 | Geraniol | C10H18O | 106-24-1 | 97.3 | 1.59 | 1.70 | 1.89 | 15.46 |
| 68 | 27.654 | 2,2'-Bifuran, octahydro- | C8H14O2 | 1592-33-2 | 70.5 | 0.012 | 0.00 | 0.00 | 0.00 |
| 69 | 28.032 | Geranial | C10H16O | 5392-40-5 | 95.6 | 1.02 | 1.04 | 1.32 | 1.05 |
| 70 | 28.153 | 3-Ethyl-3-methylheptane | C10H22 | 17302-01-1 | 81.8 | 0.10 | 0.067 | 0.037 | 0.028 |
| 71 | 28.445 | Benzofuran, 2-methyl- | C9H8O | 4265-25-2 | 78.5 | 0.037 | 0.00 | 0.00 | 0.005 |
| 72 | 28.946 | Tridecane | C13H28 | 629-50-5 | 97.1 | 0.59 | 0.058 | 0.077 | 0.00 |
| 73 | 29.180 | Naphthalene, 2-methyl- | C11H10 | 91-57-6 | 93.1 | 0.61 | 0.00 | 0.00 | 0.00 |
| 74 | 29.229 | Undecanal | C11H22O | 112-44-7 | 86.9 | 0.23 | 0.00 | 0.00 | 0.00 |
| 75 | 29.262 | 2-Heptenol | C7H14O | 1000429-19-3 | 74.3 | 0.00 | 0.00 | 0.00 | 0.041 |
| 76 | 29.432 | 3,4-Hexanedione, 2,2,5-trimethyl- | C9H16O2 | 20633-03-8 | 83.1 | 0.044 | 0.00 | 0.00 | 0.000 |
| 77 | 29.604 | trans-Geranic acid methyl ester | C11H18O2 | 1189-09-9 | 86.0 | 0.090 | 0.10 | 0.12 | 0.013 |
| 78 | 29.705 | Naphthalene, 2-methyl- | C11H10 | 91-57-6 | 84.0 | 0.35 | 0.009 | 0.052 | 0.000 |
| 79 | 30.394 | Carbonic acid, nonyl vinyl ester | C12H22O3 | 1000383-25-6 | 80.1 | 0.14 | 0.00 | 0.00 | 0.045 |
| 80 | 30.550 | 2,2,4-Trimethyl-1,3-pentanediol diisobutyrate | C16H30O4 | 6846-50-0 | 83.4 | 0.079 | 0.10 | 0.11 | 0.058 |
| 81 | 31.184 | Teksanol | C12H24O3 | 77-68-9 | 84.9 | 0.22 | 0.12 | 0.00 | 0.00 |
| 82 | 31.278 | 1,2-Ethanediol, monobenzoate | C9H10O3 | 94-33-7 | 73.7 | 0.044 | 0.00 | 0.00 | 0.00 |
| 83 | 31.603 | Acenaphthene | C12H10 | 83-32-9 | 86.3 | 0.13 | 0.00 | 0.00 | 0.00 |
| 84 | 31.750 | Helminthogermacrene | C15H24 | 75023-40-4 | 83.7 | 0.10 | 0.00 | 0.00 | 0.00 |
| 85 | 31.817 | Tetradecane | C14H30 | 629-59-4 | 95.1 | 1.21 | 0.092 | 0.062 | 0.032 |
| 86 | 32.129 | Dodecanal | C12H24O | 112-54-9 | 93.8 | 0.27 | 0.000 | 0.000 | 0.070 |
| 87 | 32.350 | Naphthalene, 1,5-dimethyl- | C12H12 | 571-61-9 | 78.9 | 0.23 | 0.00 | 0.00 | 0.00 |
| 88 | 32.535 | Clovene | C15H24 | 469-92-1 | 71.9 | 0.073 | 0.00 | 0.00 | 0.00 |
| 89 | 32.688 | Cedrene | C15H24 | 469-61-4 | 94.4 | 1.50 | 0.00 | 0.00 | 0.00 |
| 90 | 32.929 | .beta.-Cedrene | C15H24 | 546-28-1 | 90.5 | 1.20 | 0.00 | 0.00 | 0.00 |
| 91 | 33.151 | Geranylacetone | C13H22O | 3796-70-1 | 85.6 | 0.076 | 0.16 | 0.15 | 0.14 |
| 92 | 33.303 | Naphthalene, 1,2-dimethyl- | C12H12 | 573-98-8 | 92.3 | 0.18 | 0.00 | 0.00 | 0.00 |
| 93 | 33.415 | 3-Ethyl-2,6,10-trimethylundecane | C16H34 | 1000432-25-9 | 93.0 | 0.41 | 0.00 | 0.00 | 0.00 |
| 94 | 33.518 | Tridecane, 3-methyl- | C14H30 | 6418-41-3 | 87.1 | 0.16 | 0.00 | 0.10 | 0.032 |
| 95 | 33.663 | 2,5-di-tert-Butyl-1,4-benzoquinone | C14H20O2 | 2460-77-7 | 75.4 | 0.11 | 0.00 | 0.00 | 0.00 |
| 96 | 33.856 | 1-Methoxydecane | C11H24O | 7289-52-3 | 89.9 | 0.22 | 0.12 | 0.13 | 0.089 |
| 97 | 34.470 | Pentadecane | C15H32 | 629-62-9 | 97.0 | 1.27 | 0.042 | 0.036 | 0.019 |
| 98 | 34.699 | 2,4-Di-tert-butylphenol | C14H22O | 96-76-4 | 93.3 | 1.28 | 1.64 | 2.02 | 0.86 |
| 99 | 34.835 | Pentadecanal- | C15H30O | 2765/11/9 | 86.7 | 0.32 | 0.00 | 0.00 | 0.00 |
| 100 | 35.121 | Cuparene | C15H22 | 16982-00-6 | 89.1 | 0.19 | 0.00 | 0.051 | 0.00 |
| 101 | 35.543 | Naphthalene, 1,4,6-trimethyl- | C13H14 | 2131-42-2 | 89.9 | 0.16 | 0.028 | 0.00 | 0.00 |
| 102 | 36.038 | n-Nonylcyclohexane | C15H30 | 2883/2/5 | 84.8 | 0.074 | 0.00 | 0.00 | 0.00 |
| 103 | 36.767 | 2,2,4-Trimethyl-1,3-pentanediol diisobutyrate | C16H30O4 | 6846-50-0 | 95.3 | 0.31 | 0.31 | 0.29 | 0.14 |
| 104 | 36.980 | Hexadecane | C16H34 | 544-76-3 | 98.1 | 1.33 | 0.13 | 0.050 | 0.038 |
| 105 | 37.321 | Fumaric acid, ethyl 2-methylallyl ester | C10H14O4 | 1000330-54-1 | 75.6 | 0.070 | 0.034 | 0.00 | 0.00 |
| 106 | 37.614 | 4,5-Dimethoxy-2-hydroxyacetophenone | C10H12O4 | 20628-06-2 | 73.1 | 0.14 | 0.00 | 0.00 | 0.00 |
| 107 | 37.664 | Cedrol | C15H26O | 77-53-2 | 97.0 | 3.12 | 0.10 | 0.10 | 0.00 |
| 108 | 37.966 | Benzophenone | C13H10O | 119-61-9 | 77.8 | 0.14 | 0.00 | 0.00 | 0.00 |
| 109 | 39.021 | Undecane, 6,6-dimethyl- | C13H28 | 17312-76-4 | 70.6 | 0.26 | 0.00 | 0.11 | 0.012 |
| 110 | 39.215 | 1,1'-Biphenyl, 3,3',4,4'-tetramethyl- | C16H18 | 4920-95-0 | 80.0 | 0.12 | 0.00 | 0.00 | 0.00 |
| 111 | 39.254 | Benzoic acid, 2-ethylhexyl ester | C15H22O2 | 5444-75-7 | 86.5 | 0.21 | 0.00 | 0.00 | 0.00 |
| 112 | 39.298 | 2,4,2',4'-Tetramethyl-biphenyl | C16H18 | 1000486-97-7 | 89.2 | 0.49 | 0.00 | 0.00 | 0.00 |
| 113 | 39.335 | 1,14-Tetradecanediol | C14H30O2 | 19812-64-7 | 78.8 | 0.00 | 0.00 | 0.00 | 0.042 |
| 114 | 39.707 | Undecane, 3,8-dimethyl- | C13H28 | 17301-30-3 | 86.3 | 0.23 | 0.014 | 0.00 | 0.004 |
| 115 | 39.785 | 2',4',5'-Trimethoxyacetophenone | C11H14O4 | 1000433-06-4 | 70.2 | 0.030 | 0.00 | 0.00 | 0.00 |
| 116 | 40.373 | Anthracene, 1,2,3,4-tetrahydro-9-propyl- | C17H20 | 101580-33-0 | 74.6 | 0.18 | 0.00 | 0.00 | 0.00 |
| 117 | 40.485 | 1,1'-Biphenyl, 3,3',4,4'-tetramethyl- | C16H18 | 4920-95-0 | 73.8 | 0.14 | 0.00 | 0.00 | 0.00 |
| 118 | 40.995 | Isopropyl myristate | C17H34O2 | 110-27-0 | 95.1 | 0.75 | 0.00 | 0.00 | 0.00 |
| 119 | 41.281 | p-Toluic acid, 2-ethylhexyl ester | C16H24O2 | 16397-65-2 | 74.7 | 0.20 | 0.00 | 0.00 | 0.00 |
| 120 | 42.065 | Naphthalene, 1-phenyl- | C16H12 | 605-02-7 | 71.5 | 0.019 | 0.00 | 0.00 | 0.00 |
| 121 | 42.205 | 1,4-Benzenediol, 2,5-bis(1,1-dimethylethyl)- | C14H22O2 | 88-58-4 | 75.2 | 0.089 | 0.00 | 0.00 | 0.00 |

**Supplementary Table 6**. *CcTPS15* in vitro enzyme activity detection.

| No | Retention time | Compound name | Molecular Formula | CAS number | Matching% | 1 | 2 | 3 | CK |
| --- | --- | --- | --- | --- | --- | --- | --- | --- | --- |
| 1 | 6.639 | Butanoic acid, methyl ester | C5H10O2 | 623-42-7 | 90.8 | 0.00 | 0.08 | 0.10 | 0.00 |
| 2 | 8.859 | Hexanal | C6H12O | 66-25-1 | 94.1 | 0.00 | 0.05 | 0.14 | 0.56 |
| 3 | 11.203 | 2-(2-Methoxyethoxy)ethyl acetate | C7H14O4 | 1000351-95-4 | 84.6 | 0.00 | 0.04 | 0.09 | 0.14 |
| 4 | 12.888 | Heptanal | C7H14O | 111-71-7 | 91.3 | 0.03 | 0.00 | 0.11 | 0.48 |
| 5 | 14.094 | Bicyclo[3.1.0]hex-2-ene, 2-methyl-5-(1-methylethyl)- | C10H16 | 2867/5/2 | 97.2 | 2.39 | 1.68 | 1.68 | 1.69 |
| 6 | 14.524 | (1R)-(+)-.alpha.-Pinene | C10H16 | 7785-70-8 | 97.6 | 0.42 | 0.26 | 0.26 | 0.00 |
| 7 | 14.543 | Cyclofenchone | C10H16 | 488-97-1 | 94.5 | 0.42 | 0.00 | 0.26 | 0.16 |
| 8 | 16.251 | Phenylglyoxylic acid, 2-methylpropyl ester | C12H14O3 | 1000453-47-2 | 85.7 | 0.09 | 0.08 | 0.06 | 0.00 |
| 9 | 16.518 | Sabinene | C10H16 | 3387-41-5 | 98.0 | 10.10 | 6.18 | 5.83 | 4.91 |
| 10 | 16.812 | .beta.-Pinene | C10H16 | 127-91-3 | 91.2 | 0.52 | 0.14 | 0.26 | 0.31 |
| 11 | 17.022 | 5-Hepten-2-one, 6-methyl- | C8H14O | 110-93-0 | 86.5 | 0.03 | 0.09 | 0.09 | 0.23 |
| 12 | 17.235 | .beta.-Myrcene | C10H16 | 123-35-3 | 97.7 | 6.16 | 4.04 | 3.71 | 3.26 |
| 13 | 17.936 | Octanal | C8H16O | 124-13-0 | 99.0 | 0.13 | 0.38 | 1.24 | 3.29 |
| 14 | 18.146 | .alpha.-Phellandrene | C10H16 | 99-83-2 | 96.8 | 0.42 | 0.29 | 0.30 | 0.23 |
| 15 | 18.626 | (+)-4-Carene | C10H16 | 29050-33-7 | 97.4 | 1.52 | 1.09 | 1.04 | 0.88 |
| 16 | 18.984 | m-Cymene | C10H14 | 535-77-3 | 96.9 | 0.69 | 0.66 | 0.67 | 0.00 |
| 17 | 19.043 | 1-Hexanol, 2-ethyl- | C8H18O | 104-76-7 | 96.2 | 0.13 | 0.37 | 0.50 | 0.58 |
| 18 | 19.198 | D-Limonene | C10H16 | 5989-27-5 | 98.5 | 21.13 | 12.48 | 9.88 | 12.24 |
| 19 | 19.394 | trans-.beta.-Ocimene | C10H16 | 3779-61-1 | 83.5 | 0.12 | 0.96 | 0.68 | 0.03 |
| 20 | 19.864 | .beta.-Ocimene | C10H16 | 3338-55-4 | 97.7 | 1.78 | 1.42 | 1.22 | 0.88 |
| 21 | 20.444 | .gamma.-Terpinene | C10H16 | 99-85-4 | 99.1 | 2.44 | 1.68 | 1.52 | 1.48 |
| 22 | 20.916 | Cyclobutane, 1,2-diethyl-, cis- | C8H16 | 61141-50-2 | 90.9 | 0.00 | 0.00 | 0.00 | 1.76 |
| 23 | 20.977 | Linalool oxide A | C10H18O2 | 5989-33-3 | 90.6 | 0.41 | 0.47 | 0.78 | 0.00 |
| 24 | 21.592 | 2-Carene | C10H16 | 554-61-0 | 95.9 | 1.02 | 0.91 | 0.84 | 0.64 |
| 25 | 21.623 | trans-Linalool oxide (furanoid) | C10H18O2 | 34995-77-2 | 76.2 | 0.20 | 0.18 | 0.16 | 0.00 |
| 26 | 21.817 | p-(1-Propenyl)-toluene | C10H12 | 1000429-54-9 | 93.9 | 0.18 | 0.21 | 0.22 | 0.11 |
| 27 | 22.152 | Linalool | C10H18O | 78-70-6 | 99.0 | 33.94 | 37.92 | 37.95 | 0.00 |
| 28 | 22.293 | Nonanal | C9H18O | 124-19-6 | 99.3 | 0.82 | 2.09 | 6.23 | 17.53 |
| 29 | 22.507 | Thujone | C10H16O | 546-80-5 | 98.5 | 0.32 | 0.23 | 0.15 | 0.00 |
| 30 | 22.926 | (+)-.beta.-Thujone | C10H16O | 471-15-8 | 96.8 | 0.20 | 0.14 | 0.07 | 0.00 |
| 31 | 23.266 | Linalool, methyl ether | C11H20O | 1000352-63-6 | 98.2 | 3.60 | 8.63 | 8.13 | 5.08 |
| 32 | 24.099 | Citronellal | C10H18O | 106-23-0 | 93.6 | 0.13 | 0.15 | 0.08 | 0.06 |
| 33 | 24.486 | 2,6-Dimethylbicyclo[3.2.1]octane | C10H18 | 1000215-28-2 | 83.9 | 0.06 | 0.00 | 0.04 | 0.00 |
| 34 | 24.809 | 1-Nonanol | C9H20O | 143-08-8 | 82.5 | 0.31 | 0.27 | 0.23 | 0.33 |
| 35 | 25.254 | (-)-4-Terpineol | C10H18O | 20126-76-5 | 97.4 | 0.32 | 0.25 | 0.18 | 0.05 |
| 36 | 25.392 | (E)-2,6-Dimethylocta-3,7-diene-2,6-diol | C10H18O2 | 51276-34-7 | 87.6 | 0.04 | 0.09 | 0.04 | 0.31 |
| 37 | 25.542 | Naphthalene | C10H8 | 91-20-3 | 71.2 | 0.06 | 0.12 | 0.13 | 0.14 |
| 38 | 25.740 | .alpha.-Terpineol | C10H18O | 98-55-5 | 93.4 | 0.61 | 0.53 | 0.54 | 0.04 |
| 39 | 25.797 | .alpha.-Thujenal | C10H14O | 57129-54-1 | 82.8 | 0.28 | 0.19 | 0.12 | 0.00 |
| 40 | 25.968 | 1-Pentanone, 1-(2-furanyl)- | C9H12O2 | 3194-17-0 | 80.0 | 0.03 | 0.09 | 0.10 | 0.00 |
| 41 | 25.981 | Decanal | C10H20O | 112-31-2 | 70.4 | 0.07 | 0.09 | 0.06 | 0.84 |
| 42 | 26.146 | 2,3,4-Trimethyl-1-pentanol | C8H18O | 6570-88-3 | 75.5 | 0.00 | 0.00 | 0.03 | 0.00 |
| 43 | 26.425 | Geranyl methyl ether | C11H20O | 2565-82-4 | 98.9 | 3.05 | 6.95 | 7.38 | 4.62 |
| 44 | 26.524 | .alpha.-Terpinene | C10H16 | 99-86-5 | 89.8 | 0.45 | 1.23 | 1.19 | 0.25 |
| 45 | 27.089 | Citral | C10H16O | 5392-40-5 | 80.3 | 0.02 | 0.05 | 0.07 | 0.07 |
| 46 | 27.330 | Linalyl acetate | C12H20O2 | 115-95-7 | 94.2 | 0.41 | 0.15 | 0.06 | 0.00 |
| 47 | 27.379 | 3-Isopropylbenzaldehyde | C10H12O | 34246-57-6 | 77.9 | 0.11 | 0.19 | 0.21 | 0.00 |
| 48 | 27.409 | Geraniol | C10H18O | 106-24-1 | 96.3 | 0.69 | 0.91 | 0.99 | 1.17 |
| 49 | 27.862 | 2-Decenal, (E)- | C10H18O | 3913-81-3 | 93.0 | 0.00 | 0.00 | 0.00 | 0.41 |
| 50 | 27.906 | Nonanoic acid | C9H18O2 | 112-05-0 | 83.9 | 0.00 | 0.00 | 0.00 | 0.00 |
| 51 | 28.019 | Neral | C10H16O | 141-27-5 | 82.7 | 0.03 | 0.15 | 0.22 | 0.12 |
| 52 | 28.137 | 1,7-Octadiene-3,6-diol, 2,6-dimethyl- | C10H18O2 | 51276-33-6 | 79.6 | 0.18 | 0.00 | 0.00 | 0.00 |
| 53 | 28.137 | Undecane, 3,8-dimethyl- | C13H28 | 17301-30-3 | 82.0 | 0.20 | 0.00 | 0.00 | 0.00 |
| 54 | 28.176 | cis-3-Hexenyl iso-butyrate | C10H18O2 | 41519-23-7 | 90.6 | 0.00 | 0.10 | 0.12 | 0.00 |
| 55 | 28.913 | Tridecane | C13H28 | 629-50-5 | 81.0 | 0.05 | 0.06 | 0.03 | 0.04 |
| 56 | 29.192 | Naphthalene, 2-methyl- | C11H10 | 91-57-6 | 75.5 | 0.00 | 0.00 | 0.00 | 0.04 |
| 57 | 29.575 | trans-Geranic acid methyl ester | C11H18O2 | 1189-09-9 | 74.6 | 0.03 | 0.09 | 0.07 | 0.03 |
| 58 | 30.403 | .alpha.-Terpinyl acetate | C12H20O2 | 80-26-2 | 89.5 | 0.08 | 0.10 | 0.11 | 0.00 |
| 59 | 30.502 | 2,2,4-Trimethyl-1,3-pentanediol diisobutyrate | C16H30O4 | 6846-50-0 | 86.4 | 0.11 | 0.23 | 0.31 | 0.82 |
| 60 | 30.914 | 2-Undecenal, E- | C11H20O | 53448-07-0 | 76.0 | 0.00 | 0.00 | 0.00 | 0.24 |
| 61 | 31.146 | Teksanol | C12H24O3 | 77-68-9 | 86.1 | 0.08 | 0.22 | 0.27 | 1.08 |
| 62 | 31.157 | Geranyl acetate | C12H20O2 | 105-87-3 | 93.5 | 0.27 | 0.12 | 0.03 | 0.00 |
| 63 | 31.392 | .alpha.-Cubebene | C15H24 | 17699-14-8 | 88.7 | 0.06 | 0.06 | 0.31 | 0.53 |
| 64 | 31.710 | .beta.-Elemene | C15H24 | 515-13-9 | 95.1 | 0.07 | 0.04 | 0.04 | 0.00 |
| 65 | 31.785 | Tetradecane | C14H30 | 629-59-4 | 95.6 | 0.06 | 0.08 | 0.05 | 0.15 |
| 66 | 32.117 | Dodecanal | C12H24O | 112-54-9 | 88.9 | 0.04 | 0.08 | 0.05 | 0.16 |
| 67 | 32.686 | Caryophyllene | C15H24 | 87-44-5 | 98.3 | 0.41 | 0.21 | 0.19 | 0.11 |
| 68 | 32.927 | (+)-epi-Bicyclosesquiphellandrene | C15H24 | 54274-73-6 | 85.0 | 0.05 | 0.11 | 0.03 | 0.06 |
| 69 | 33.142 | Geranylacetone | C13H22O | 3796-70-1 | 76.2 | 0.00 | 0.00 | 0.00 | 0.40 |
| 70 | 33.653 | .alpha.-Caryophyllene | C15H24 | 006753-98-6 | 98.3 | 0.27 | 0.14 | 0.11 | 0.00 |
| 71 | 33.825 | 1-Dodecanol | C12H26O | 112-53-8 | 97.3 | 0.09 | 0.23 | 0.21 | 0.30 |
| 72 | 34.548 | .beta.-Selinene | C15H24 | 17066-67-0 | 94.4 | 0.15 | 0.06 | 0.13 | 0.00 |
| 73 | 34.659 | 2,4-Di-tert-butylphenol | C14H22O | 96-76-4 | 80.4 | 0.15 | 0.38 | 0.24 | 0.30 |
| 74 | 34.714 | 9-Methyltetracyclo[7.3.1.0(2.7).1(7.11)]tetradecane | C15H24 | 1000215-30-5 | 77.0 | 0.16 | 0.00 | 0.18 | 0.00 |
| 75 | 34.816 | .beta.-Cedrene | C15H24 | 546-28-1 | 81.9 | 0.05 | 0.10 | 0.08 | 0.00 |
| 76 | 35.117 | .gamma.-Cadinene | C15H24 | 39029-41-9 | 96.9 | 0.19 | 0.11 | 0.16 | 0.00 |
| 77 | 35.185 | .delta.-Cadinene | C15H24 | 483-76-1 | 94.0 | 0.20 | 0.04 | 0.05 | 0.00 |
| 78 | 35.323 | Calamenene | C15H22 | 483-77-2 | 92.0 | 0.09 | 0.14 | 0.13 | 0.09 |
| 79 | 35.717 | (-)-.alpha.-Cadinene | C15H24 | 24406-05-1 | 91.3 | 0.05 | 0.04 | 0.00 | 0.00 |
| 80 | 35.875 | .alpha.-Calacorene | C15H20 | 21391-99-1 | 90.6 | 0.09 | 0.15 | 0.18 | 0.14 |
| 81 | 36.120 | trans-Nerolidol | C15H26O | 40716-66-3 | 97.5 | 0.35 | 0.21 | 0.16 | 0.00 |
| 82 | 36.728 | 2,2,4-Trimethyl-1,3-pentanediol diisobutyrate | C16H30O4 | 6846-50-0 | 96.0 | 0.06 | 0.16 | 0.14 | 0.40 |
| 83 | 36.950 | Hexadecane | C16H34 | 544-76-3 | 89.5 | 0.04 | 0.06 | 0.04 | 0.07 |
| 84 | 37.621 | Cedrol | C15H26O | 77-53-2 | 96.9 | 0.19 | 0.47 | 0.44 | 0.60 |
| 85 | 37.916 | Nonane, 2-methyl- | C10H22 | 871-83-0 | 79.2 | 0.00 | 0.00 | 0.00 | 0.00 |
| 86 | 38.259 | Octane, 1,1'-oxybis- | C16H34O | 629-82-3 | 96.9 | 0.10 | 0.61 | 0.09 | 1.67 |
| 87 | 38.788 | Hexanoic acid, 3,5,5-trimethyl-, nonyl ester | C18H36O2 | 1000406-06-0 | 75.9 | 0.17 | 1.31 | 0.17 | 5.19 |
| 88 | 38.926 | Heptadecane, 2-methyl- | C18H38 | 1560-89-0 | 80.1 | 0.00 | 0.00 | 0.00 | 0.00 |
| 89 | 38.990 | Decane, 2,4-dimethyl- | C12H26 | 2801-84-5 | 74.9 | 0.00 | 0.04 | 0.03 | 0.00 |
| 90 | 40.710 | 3-Ethyl-2,6,10-trimethylundecane | C16H34 | 1000432-25-9 | 89.6 | 0.00 | 0.05 | 0.00 | 0.00 |
| 91 | 40.971 | Isopropyl myristate | C17H34O2 | 110-27-0 | 74.0 | 0.00 | 0.04 | 0.00 | 0.07 |

**Supplementary Table 7**. *CcTPS16* in vitro enzyme activity detection.

| No | Retention time | Compound name | Molecular Formula | CAS number | Matching% | 1 | 2 | 3 | CK |
| --- | --- | --- | --- | --- | --- | --- | --- | --- | --- |
| 1 | 6.639 | Butanoic acid, methyl ester | C5H10O2 | 623-42-7 | 90.8 | 0.08 | 0.07 | 0.10 | 0.00 |
| 2 | 8.859 | Hexanal | C6H12O | 66-25-1 | 94.1 | 0.12 | 0.14 | 0.05 | 0.56 |
| 3 | 11.203 | 2-(2-Methoxyethoxy)ethyl acetate | C7H14O4 | 1000351-95-4 | 84.6 | 0.00 | 0.00 | 0.00 | 0.14 |
| 4 | 12.888 | Heptanal | C7H14O | 111-71-7 | 91.3 | 0.09 | 0.18 | 0.11 | 0.48 |
| 5 | 14.094 | Bicyclo[3.1.0]hex-2-ene, 2-methyl-5-(1-methylethyl)- | C10H16 | 2867/5/2 | 97.2 | 1.81 | 2.45 | 1.37 | 1.69 |
| 6 | 14.524 | (1R)-(+)-.alpha.-Pinene | C10H16 | 7785-70-8 | 97.6 | 0.23 | 0.29 | 0.16 | 0.00 |
| 7 | 14.543 | Cyclofenchone | C10H16 | 488-97-1 | 94.5 | 0.24 | 0.00 | 0.00 | 0.16 |
| 8 | 16.251 | Phenylglyoxylic acid, 2-methylpropyl ester | C12H14O3 | 1000453-47-2 | 85.7 | 0.00 | 0.00 | 0.00 | 0.00 |
| 9 | 16.518 | Sabinene | C10H16 | 3387-41-5 | 98.0 | 6.13 | 8.39 | 4.13 | 4.91 |
| 10 | 16.812 | .beta.-Pinene | C10H16 | 127-91-3 | 91.2 | 0.00 | 0.42 | 0.42 | 0.31 |
| 11 | 17.022 | 5-Hepten-2-one, 6-methyl- | C8H14O | 110-93-0 | 86.5 | 0.09 | 0.08 | 0.12 | 0.23 |
| 12 | 17.235 | .beta.-Myrcene | C10H16 | 123-35-3 | 97.7 | 3.83 | 4.24 | 3.70 | 3.26 |
| 13 | 17.936 | Octanal | C8H16O | 124-13-0 | 99.0 | 1.08 | 1.79 | 1.68 | 3.29 |
| 14 | 18.146 | .alpha.-Phellandrene | C10H16 | 99-83-2 | 96.8 | 0.26 | 0.30 | 0.25 | 0.23 |
| 15 | 18.626 | (+)-4-Carene | C10H16 | 29050-33-7 | 97.4 | 1.02 | 1.21 | 0.86 | 0.88 |
| 16 | 18.984 | m-Cymene | C10H14 | 535-77-3 | 96.9 | 0.61 | 0.54 | 0.55 | 0.00 |
| 17 | 19.043 | 1-Hexanol, 2-ethyl- | C8H18O | 104-76-7 | 96.2 | 0.63 | 0.47 | 1.14 | 0.58 |
| 18 | 19.198 | D-Limonene | C10H16 | 5989-27-5 | 98.5 | 9.65 | 13.50 | 8.27 | 12.24 |
| 19 | 19.394 | trans-.beta.-Ocimene | C10H16 | 3779-61-1 | 83.5 | 0.68 | 0.05 | 0.81 | 0.03 |
| 20 | 19.864 | .beta.-Ocimene | C10H16 | 3338-55-4 | 97.7 | 1.23 | 1.06 | 1.30 | 0.88 |
| 21 | 20.444 | .gamma.-Terpinene | C10H16 | 99-85-4 | 99.1 | 1.57 | 2.00 | 1.31 | 1.48 |
| 22 | 20.916 | Cyclobutane, 1,2-diethyl-, cis- | C8H16 | 61141-50-2 | 90.9 | 0.00 | 0.69 | 0.60 | 1.76 |
| 23 | 20.977 | Linalool oxide A | C10H18O2 | 5989-33-3 | 90.6 | 0.94 | 0.44 | 0.14 | 0.00 |
| 24 | 21.592 | 2-Carene | C10H16 | 554-61-0 | 95.9 | 0.84 | 0.86 | 0.79 | 0.64 |
| 25 | 21.623 | trans-Linalool oxide (furanoid) | C10H18O2 | 34995-77-2 | 76.2 | 0.84 | 0.13 | 0.00 | 0.00 |
| 26 | 21.817 | p-(1-Propenyl)-toluene | C10H12 | 1000429-54-9 | 93.9 | 0.16 | 0.14 | 0.16 | 0.11 |
| 27 | 22.152 | Linalool | C10H18O | 78-70-6 | 99.0 | 38.28 | 34.76 | 35.99 | 0.00 |
| 28 | 22.293 | Nonanal | C9H18O | 124-19-6 | 99.3 | 5.79 | 8.52 | 9.49 | 17.53 |
| 29 | 22.507 | Thujone | C10H16O | 546-80-5 | 98.5 | 0.11 | 0.10 | 0.00 | 0.00 |
| 30 | 22.926 | (+)-.beta.-Thujone | C10H16O | 471-15-8 | 96.8 | 0.06 | 0.00 | 0.00 | 0.00 |
| 31 | 23.266 | Linalool, methyl ether | C11H20O | 1000352-63-6 | 98.2 | 6.99 | 4.06 | 9.67 | 5.08 |
| 32 | 24.099 | Citronellal | C10H18O | 106-23-0 | 93.6 | 0.07 | 0.06 | 0.07 | 0.06 |
| 33 | 24.486 | 2,6-Dimethylbicyclo[3.2.1]octane | C10H18 | 1000215-28-2 | 83.9 | 0.00 | 0.00 | 0.00 | 0.00 |
| 34 | 24.809 | 1-Nonanol | C9H20O | 143-08-8 | 82.5 | 0.22 | 0.21 | 0.13 | 0.33 |
| 35 | 25.254 | (-)-4-Terpineol | C10H18O | 20126-76-5 | 97.4 | 0.15 | 0.12 | 0.12 | 0.05 |
| 36 | 25.392 | (E)-2,6-Dimethylocta-3,7-diene-2,6-diol | C10H18O2 | 51276-34-7 | 87.6 | 0.00 | 0.29 | 0.00 | 0.31 |
| 37 | 25.542 | Naphthalene | C10H8 | 91-20-3 | 71.2 | 0.00 | 0.11 | 0.17 | 0.14 |
| 38 | 25.740 | .alpha.-Terpineol | C10H18O | 98-55-5 | 93.4 | 0.61 | 0.55 | 0.62 | 0.04 |
| 39 | 25.797 | .alpha.-Thujenal | C10H14O | 57129-54-1 | 82.8 | 0.00 | 0.00 | 0.00 | 0.00 |
| 40 | 25.968 | 1-Pentanone, 1-(2-furanyl)- | C9H12O2 | 3194-17-0 | 80.0 | 0.13 | 0.11 | 0.06 | 0.00 |
| 41 | 25.981 | Decanal | C10H20O | 112-31-2 | 70.4 | 0.21 | 0.26 | 0.00 | 0.84 |
| 42 | 26.146 | 2,3,4-Trimethyl-1-pentanol | C8H18O | 6570-88-3 | 75.5 | 0.06 | 0.04 | 0.00 | 0.00 |
| 43 | 26.425 | Geranyl methyl ether | C11H20O | 2565-82-4 | 98.9 | 7.18 | 5.02 | 8.95 | 4.62 |
| 44 | 26.524 | .alpha.-Terpinene | C10H16 | 99-86-5 | 89.8 | 0.42 | 0.29 | 1.14 | 0.25 |
| 45 | 27.089 | Citral | C10H16O | 5392-40-5 | 80.3 | 0.10 | 0.09 | 0.12 | 0.07 |
| 46 | 27.330 | Linalyl acetate | C12H20O2 | 115-95-7 | 94.2 | 0.00 | 0.00 | 0.00 | 0.00 |
| 47 | 27.379 | 3-Isopropylbenzaldehyde | C10H12O | 34246-57-6 | 77.9 | 0.00 | 0.25 | 0.19 | 0.00 |
| 48 | 27.409 | Geraniol | C10H18O | 106-24-1 | 96.3 | 1.29 | 1.09 | 1.00 | 1.17 |
| 49 | 27.862 | 2-Decenal, (E)- | C10H18O | 3913-81-3 | 93.0 | 0.00 | 0.00 | 0.00 | 0.41 |
| 50 | 27.906 | Nonanoic acid | C9H18O2 | 112-05-0 | 83.9 | 0.00 | 0.00 | 0.00 | 0.00 |
| 51 | 28.019 | Neral | C10H16O | 141-27-5 | 82.7 | 0.26 | 0.21 | 0.54 | 0.12 |
| 52 | 28.137 | 1,7-Octadiene-3,6-diol, 2,6-dimethyl- | C10H18O2 | 51276-33-6 | 79.6 | 0.06 | 0.07 | 0.00 | 0.00 |
| 53 | 28.137 | Undecane, 3,8-dimethyl- | C13H28 | 17301-30-3 | 82.0 | 0.04 | 0.00 | 0.00 | 0.00 |
| 54 | 28.176 | cis-3-Hexenyl iso-butyrate | C10H18O2 | 41519-23-7 | 90.6 | 0.08 | 0.00 | 0.04 | 0.00 |
| 55 | 28.913 | Tridecane | C13H28 | 629-50-5 | 81.0 | 0.06 | 0.04 | 0.06 | 0.04 |
| 56 | 29.192 | Naphthalene, 2-methyl- | C11H10 | 91-57-6 | 75.5 | 0.00 | 0.00 | 0.00 | 0.04 |
| 57 | 29.575 | trans-Geranic acid methyl ester | C11H18O2 | 1189-09-9 | 74.6 | 0.07 | 0.00 | 0.08 | 0.03 |
| 58 | 30.403 | .alpha.-Terpinyl acetate | C12H20O2 | 80-26-2 | 89.5 | 0.12 | 0.11 | 0.14 | 0.00 |
| 59 | 30.502 | 2,2,4-Trimethyl-1,3-pentanediol diisobutyrate | C16H30O4 | 6846-50-0 | 86.4 | 0.72 | 0.63 | 0.20 | 0.82 |
| 60 | 30.914 | 2-Undecenal, E- | C11H20O | 53448-07-0 | 76.0 | 0.00 | 0.00 | 0.00 | 0.24 |
| 61 | 31.146 | Teksanol | C12H24O3 | 77-68-9 | 86.1 | 0.85 | 0.84 | 0.23 | 1.08 |
| 62 | 31.157 | Geranyl acetate | C12H20O2 | 105-87-3 | 93.5 | 0.00 | 0.00 | 0.00 | 0.00 |
| 63 | 31.392 | .alpha.-Cubebene | C15H24 | 17699-14-8 | 88.7 | 0.00 | 0.04 | 0.00 | 0.53 |
| 64 | 31.710 | .beta.-Elemene | C15H24 | 515-13-9 | 95.1 | 0.00 | 0.00 | 0.00 | 0.00 |
| 65 | 31.785 | Tetradecane | C14H30 | 629-59-4 | 95.6 | 0.12 | 0.09 | 0.07 | 0.15 |
| 66 | 32.117 | Dodecanal | C12H24O | 112-54-9 | 88.9 | 0.15 | 0.09 | 0.13 | 0.16 |
| 67 | 32.686 | Caryophyllene | C15H24 | 87-44-5 | 98.3 | 0.11 | 0.18 | 0.08 | 0.11 |
| 68 | 32.927 | (+)-epi-Bicyclosesquiphellandrene | C15H24 | 54274-73-6 | 85.0 | 0.06 | 0.05 | 0.05 | 0.06 |
| 69 | 33.142 | Geranylacetone | C13H22O | 3796-70-1 | 76.2 | 0.00 | 0.00 | 0.00 | 0.40 |
| 70 | 33.653 | .alpha.-Caryophyllene | C15H24 | 006753-98-6 | 98.3 | 0.06 | 0.00 | 0.00 | 0.00 |
| 71 | 33.825 | 1-Dodecanol | C12H26O | 112-53-8 | 97.3 | 0.34 | 0.24 | 0.21 | 0.30 |
| 72 | 34.548 | .beta.-Selinene | C15H24 | 17066-67-0 | 94.4 | 0.00 | 0.00 | 0.00 | 0.00 |
| 73 | 34.659 | 2,4-Di-tert-butylphenol | C14H22O | 96-76-4 | 80.4 | 0.51 | 0.31 | 0.51 | 0.30 |
| 74 | 34.714 | 9-Methyltetracyclo[7.3.1.0(2.7).1(7.11)]tetradecane | C15H24 | 1000215-30-5 | 77.0 | 0.00 | 0.00 | 0.00 | 0.00 |
| 75 | 34.816 | .beta.-Cedrene | C15H24 | 546-28-1 | 81.9 | 0.00 | 0.00 | 0.00 | 0.00 |
| 76 | 35.117 | .gamma.-Cadinene | C15H24 | 39029-41-9 | 96.9 | 0.06 | 0.04 | 0.04 | 0.00 |
| 77 | 35.185 | .delta.-Cadinene | C15H24 | 483-76-1 | 94.0 | 0.00 | 0.00 | 0.00 | 0.00 |
| 78 | 35.323 | Calamenene | C15H22 | 483-77-2 | 92.0 | 0.16 | 0.12 | 0.15 | 0.09 |
| 79 | 35.717 | (-)-.alpha.-Cadinene | C15H24 | 24406-05-1 | 91.3 | 0.00 | 0.00 | 0.00 | 0.00 |
| 80 | 35.875 | .alpha.-Calacorene | C15H20 | 21391-99-1 | 90.6 | 0.17 | 0.14 | 0.15 | 0.14 |
| 81 | 36.120 | trans-Nerolidol | C15H26O | 40716-66-3 | 97.5 | 0.10 | 0.06 | 0.00 | 0.00 |
| 82 | 36.728 | 2,2,4-Trimethyl-1,3-pentanediol diisobutyrate | C16H30O4 | 6846-50-0 | 96.0 | 0.37 | 0.34 | 0.15 | 0.40 |
| 83 | 36.950 | Hexadecane | C16H34 | 544-76-3 | 89.5 | 0.04 | 0.04 | 0.06 | 0.07 |
| 84 | 37.621 | Cedrol | C15H26O | 77-53-2 | 96.9 | 0.80 | 0.59 | 0.54 | 0.60 |
| 85 | 37.916 | Nonane, 2-methyl- | C10H22 | 871-83-0 | 79.2 | 0.00 | 0.00 | 0.06 | 0.00 |
| 86 | 38.259 | Octane, 1,1'-oxybis- | C16H34O | 629-82-3 | 96.9 | 0.27 | 0.10 | 0.26 | 1.67 |
| 87 | 38.788 | Hexanoic acid, 3,5,5-trimethyl-, nonyl ester | C18H36O2 | 1000406-06-0 | 75.9 | 0.40 | 0.21 | 0.32 | 5.19 |
| 88 | 38.926 | Heptadecane, 2-methyl- | C18H38 | 1560-89-0 | 80.1 | 0.00 | 0.00 | 0.17 | 0.00 |
| 89 | 38.990 | Decane, 2,4-dimethyl- | C12H26 | 2801-84-5 | 74.9 | 0.13 | 0.00 | 0.00 | 0.00 |
| 90 | 40.710 | 3-Ethyl-2,6,10-trimethylundecane | C16H34 | 1000432-25-9 | 89.6 | 0.05 | 0.00 | 0.05 | 0.00 |
| 91 | 40.971 | Isopropyl myristate | C17H34O2 | 110-27-0 | 74.0 | 0.06 | 0.07 | 0.00 | 0.07 |

**Supplementary Table 8**. *CcTPS32* in vitro enzyme activity detection.

| No | Retention time | Compound name | Molecular Formula | CAS number | Matching% | 1 | 2 | 3 | CK |
| --- | --- | --- | --- | --- | --- | --- | --- | --- | --- |
| 1 | 6.639 | Butanoic acid, methyl ester | C5H10O2 | 623-42-7 | 90.8 | 0.10 | 0.10 | 0.00 | 0.00 |
| 2 | 8.859 | Hexanal | C6H12O | 66-25-1 | 94.1 | 0.07 | 0.00 | 0.11 | 0.56 |
| 3 | 11.203 | 2-(2-Methoxyethoxy)ethyl acetate | C7H14O4 | 1000351-95-4 | 84.6 | 0.00 | 0.00 | 0.00 | 0.14 |
| 4 | 12.888 | Heptanal | C7H14O | 111-71-7 | 91.3 | 0.17 | 0.26 | 0.17 | 0.48 |
| 5 | 14.094 | Bicyclo[3.1.0]hex-2-ene, 2-methyl-5-(1-methylethyl)- | C10H16 | 2867/5/2 | 97.2 | 1.22 | 1.61 | 2.66 | 1.69 |
| 6 | 14.524 | (1R)-(+)-.alpha.-Pinene | C10H16 | 7785-70-8 | 97.6 | 0.13 | 0.17 | 0.26 | 0.00 |
| 7 | 14.543 | Cyclofenchone | C10H16 | 488-97-1 | 94.5 | 0.00 | 0.00 | 0.27 | 0.16 |
| 8 | 16.251 | Phenylglyoxylic acid, 2-methylpropyl ester | C12H14O3 | 1000453-47-2 | 85.7 | 0.00 | 0.00 | 0.08 | 0.00 |
| 9 | 16.518 | Sabinene | C10H16 | 3387-41-5 | 98.0 | 3.88 | 5.23 | 8.16 | 4.91 |
| 10 | 16.812 | .beta.-Pinene | C10H16 | 127-91-3 | 91.2 | 0.10 | 0.12 | 0.00 | 0.31 |
| 11 | 17.022 | 5-Hepten-2-one, 6-methyl- | C8H14O | 110-93-0 | 86.5 | 0.11 | 0.14 | 0.07 | 0.23 |
| 12 | 17.235 | .beta.-Myrcene | C10H16 | 123-35-3 | 97.7 | 3.19 | 3.66 | 4.31 | 3.26 |
| 13 | 17.936 | Octanal | C8H16O | 124-13-0 | 99.0 | 2.34 | 1.99 | 1.55 | 3.29 |
| 14 | 18.146 | .alpha.-Phellandrene | C10H16 | 99-83-2 | 96.8 | 0.21 | 0.24 | 0.32 | 0.23 |
| 15 | 18.626 | (+)-4-Carene | C10H16 | 29050-33-7 | 97.4 | 0.75 | 0.86 | 1.34 | 0.88 |
| 16 | 18.984 | m-Cymene | C10H14 | 535-77-3 | 96.9 | 0.38 | 0.42 | 0.65 | 0.00 |
| 17 | 19.043 | 1-Hexanol, 2-ethyl- | C8H18O | 104-76-7 | 96.2 | 0.53 | 0.56 | 0.80 | 0.58 |
| 18 | 19.198 | D-Limonene | C10H16 | 5989-27-5 | 98.5 | 7.65 | 11.19 | 17.20 | 12.24 |
| 19 | 19.394 | trans-.beta.-Ocimene | C10H16 | 3779-61-1 | 83.5 | 0.73 | 0.65 | 0.00 | 0.03 |
| 20 | 19.864 | .beta.-Ocimene | C10H16 | 3338-55-4 | 97.7 | 1.14 | 1.11 | 1.02 | 0.88 |
| 21 | 20.444 | .gamma.-Terpinene | C10H16 | 99-85-4 | 99.1 | 1.16 | 1.43 | 2.29 | 1.48 |
| 22 | 20.916 | Cyclobutane, 1,2-diethyl-, cis- | C8H16 | 61141-50-2 | 90.9 | 0.76 | 0.57 | 0.43 | 1.76 |
| 23 | 20.977 | Linalool oxide A | C10H18O2 | 5989-33-3 | 90.6 | 0.00 | 0.00 | 0.65 | 0.00 |
| 24 | 21.592 | 2-Carene | C10H16 | 554-61-0 | 95.9 | 0.73 | 0.68 | 0.93 | 0.64 |
| 25 | 21.623 | trans-Linalool oxide (furanoid) | C10H18O2 | 34995-77-2 | 76.2 | 0.00 | 0.00 | 0.00 | 0.00 |
| 26 | 21.817 | p-(1-Propenyl)-toluene | C10H12 | 1000429-54-9 | 93.9 | 0.14 | 0.13 | 0.16 | 0.11 |
| 27 | 22.152 | Linalool | C10H18O | 78-70-6 | 99.0 | 32.25 | 31.09 | 27.08 | 0.00 |
| 28 | 22.293 | Nonanal | C9H18O | 124-19-6 | 99.3 | 12.93 | 9.99 | 8.49 | 17.53 |
| 29 | 22.507 | Thujone | C10H16O | 546-80-5 | 98.5 | 0.00 | 0.00 | 0.00 | 0.00 |
| 30 | 22.926 | (+)-.beta.-Thujone | C10H16O | 471-15-8 | 96.8 | 0.00 | 0.00 | 0.00 | 0.00 |
| 31 | 23.266 | Linalool, methyl ether | C11H20O | 1000352-63-6 | 98.2 | 11.78 | 9.35 | 5.17 | 5.08 |
| 32 | 24.099 | Citronellal | C10H18O | 106-23-0 | 93.6 | 0.04 | 0.05 | 0.08 | 0.06 |
| 33 | 24.486 | 2,6-Dimethylbicyclo[3.2.1]octane | C10H18 | 1000215-28-2 | 83.9 | 0.00 | 0.00 | 0.00 | 0.00 |
| 34 | 24.809 | 1-Nonanol | C9H20O | 143-08-8 | 82.5 | 0.20 | 0.27 | 0.28 | 0.33 |
| 35 | 25.254 | (-)-4-Terpineol | C10H18O | 20126-76-5 | 97.4 | 0.08 | 0.07 | 0.10 | 0.05 |
| 36 | 25.392 | (E)-2,6-Dimethylocta-3,7-diene-2,6-diol | C10H18O2 | 51276-34-7 | 87.6 | 0.00 | 0.00 | 0.00 | 0.31 |
| 37 | 25.542 | Naphthalene | C10H8 | 91-20-3 | 71.2 | 0.15 | 0.18 | 0.29 | 0.14 |
| 38 | 25.740 | .alpha.-Terpineol | C10H18O | 98-55-5 | 93.4 | 0.05 | 0.42 | 0.93 | 0.04 |
| 39 | 25.797 | .alpha.-Thujenal | C10H14O | 57129-54-1 | 82.8 | 0.00 | 0.00 | 0.00 | 0.00 |
| 40 | 25.968 | 1-Pentanone, 1-(2-furanyl)- | C9H12O2 | 3194-17-0 | 80.0 | 0.05 | 0.09 | 0.00 | 0.00 |
| 41 | 25.981 | Decanal | C10H20O | 112-31-2 | 70.4 | 0.22 | 0.32 | 0.14 | 0.84 |
| 42 | 26.146 | 2,3,4-Trimethyl-1-pentanol | C8H18O | 6570-88-3 | 75.5 | 0.00 | 0.00 | 0.00 | 0.00 |
| 43 | 26.425 | Geranyl methyl ether | C11H20O | 2565-82-4 | 98.9 | 10.67 | 9.30 | 4.94 | 4.62 |
| 44 | 26.524 | .alpha.-Terpinene | C10H16 | 99-86-5 | 89.8 | 1.64 | 1.40 | 0.29 | 0.25 |
| 45 | 27.089 | Citral | C10H16O | 5392-40-5 | 80.3 | 0.08 | 0.10 | 0.00 | 0.07 |
| 46 | 27.330 | Linalyl acetate | C12H20O2 | 115-95-7 | 94.2 | 0.00 | 0.00 | 0.00 | 0.00 |
| 47 | 27.379 | 3-Isopropylbenzaldehyde | C10H12O | 34246-57-6 | 77.9 | 0.00 | 0.11 | 0.49 | 0.00 |
| 48 | 27.409 | Geraniol | C10H18O | 106-24-1 | 96.3 | 1.00 | 1.08 | 0.60 | 1.17 |
| 49 | 27.862 | 2-Decenal, (E)- | C10H18O | 3913-81-3 | 93.0 | 0.00 | 0.00 | 0.00 | 0.41 |
| 50 | 27.906 | Nonanoic acid | C9H18O2 | 112-05-0 | 83.9 | 0.00 | 0.99 | 0.00 | 0.00 |
| 51 | 28.019 | Neral | C10H16O | 141-27-5 | 82.7 | 0.24 | 0.33 | 0.13 | 0.12 |
| 52 | 28.137 | 1,7-Octadiene-3,6-diol, 2,6-dimethyl- | C10H18O2 | 51276-33-6 | 79.6 | 0.00 | 0.00 | 0.19 | 0.00 |
| 53 | 28.137 | Undecane, 3,8-dimethyl- | C13H28 | 17301-30-3 | 82.0 | 0.00 | 0.13 | 0.18 | 0.00 |
| 54 | 28.176 | cis-3-Hexenyl iso-butyrate | C10H18O2 | 41519-23-7 | 90.6 | 0.15 | 0.06 | 0.21 | 0.00 |
| 55 | 28.913 | Tridecane | C13H28 | 629-50-5 | 81.0 | 0.06 | 0.26 | 0.07 | 0.04 |
| 56 | 29.192 | Naphthalene, 2-methyl- | C11H10 | 91-57-6 | 75.5 | 0.00 | 0.00 | 0.00 | 0.04 |
| 57 | 29.575 | trans-Geranic acid methyl ester | C11H18O2 | 1189-09-9 | 74.6 | 0.16 | 0.00 | 0.03 | 0.03 |
| 58 | 30.403 | .alpha.-Terpinyl acetate | C12H20O2 | 80-26-2 | 89.5 | 0.10 | 0.16 | 0.26 | 0.00 |
| 59 | 30.502 | 2,2,4-Trimethyl-1,3-pentanediol diisobutyrate | C16H30O4 | 6846-50-0 | 86.4 | 0.17 | 0.14 | 0.44 | 0.82 |
| 60 | 30.914 | 2-Undecenal, E- | C11H20O | 53448-07-0 | 76.0 | 0.00 | 0.00 | 0.00 | 0.24 |
| 61 | 31.146 | Teksanol | C12H24O3 | 77-68-9 | 86.1 | 0.17 | 0.21 | 0.51 | 1.08 |
| 62 | 31.157 | Geranyl acetate | C12H20O2 | 105-87-3 | 93.5 | 0.00 | 0.00 | 0.00 | 0.00 |
| 63 | 31.392 | .alpha.-Cubebene | C15H24 | 17699-14-8 | 88.7 | 0.04 | 0.00 | 0.00 | 0.53 |
| 64 | 31.710 | .beta.-Elemene | C15H24 | 515-13-9 | 95.1 | 0.00 | 0.00 | 0.00 | 0.00 |
| 65 | 31.785 | Tetradecane | C14H30 | 629-59-4 | 95.6 | 0.12 | 0.25 | 0.17 | 0.15 |
| 66 | 32.117 | Dodecanal | C12H24O | 112-54-9 | 88.9 | 0.08 | 0.13 | 0.17 | 0.16 |
| 67 | 32.686 | Caryophyllene | C15H24 | 87-44-5 | 98.3 | 0.06 | 0.07 | 0.21 | 0.11 |
| 68 | 32.927 | (+)-epi-Bicyclosesquiphellandrene | C15H24 | 54274-73-6 | 85.0 | 0.04 | 0.06 | 0.16 | 0.06 |
| 69 | 33.142 | Geranylacetone | C13H22O | 3796-70-1 | 76.2 | 0.00 | 0.00 | 0.00 | 0.40 |
| 70 | 33.653 | .alpha.-Caryophyllene | C15H24 | 006753-98-6 | 98.3 | 0.00 | 0.00 | 0.00 | 0.00 |
| 71 | 33.825 | 1-Dodecanol | C12H26O | 112-53-8 | 97.3 | 0.23 | 0.26 | 0.59 | 0.30 |
| 72 | 34.548 | .beta.-Selinene | C15H24 | 17066-67-0 | 94.4 | 0.00 | 0.00 | 0.00 | 0.00 |
| 73 | 34.659 | 2,4-Di-tert-butylphenol | C14H22O | 96-76-4 | 80.4 | 0.28 | 0.43 | 0.75 | 0.30 |
| 74 | 34.714 | 9-Methyltetracyclo[7.3.1.0(2.7).1(7.11)]tetradecane | C15H24 | 1000215-30-5 | 77.0 | 0.00 | 0.00 | 0.00 | 0.00 |
| 75 | 34.816 | .beta.-Cedrene | C15H24 | 546-28-1 | 81.9 | 0.00 | 0.00 | 0.00 | 0.00 |
| 76 | 35.117 | .gamma.-Cadinene | C15H24 | 39029-41-9 | 96.9 | 0.00 | 0.00 | 0.00 | 0.00 |
| 77 | 35.185 | .delta.-Cadinene | C15H24 | 483-76-1 | 94.0 | 0.00 | 0.00 | 0.00 | 0.00 |
| 78 | 35.323 | Calamenene | C15H22 | 483-77-2 | 92.0 | 0.11 | 0.12 | 0.17 | 0.09 |
| 79 | 35.717 | (-)-.alpha.-Cadinene | C15H24 | 24406-05-1 | 91.3 | 0.00 | 0.00 | 0.00 | 0.00 |
| 80 | 35.875 | .alpha.-Calacorene | C15H20 | 21391-99-1 | 90.6 | 0.14 | 0.14 | 0.20 | 0.14 |
| 81 | 36.120 | trans-Nerolidol | C15H26O | 40716-66-3 | 97.5 | 0.00 | 0.00 | 0.00 | 0.00 |
| 82 | 36.728 | 2,2,4-Trimethyl-1,3-pentanediol diisobutyrate | C16H30O4 | 6846-50-0 | 96.0 | 0.15 | 0.15 | 0.39 | 0.40 |
| 83 | 36.950 | Hexadecane | C16H34 | 544-76-3 | 89.5 | 0.05 | 0.05 | 0.07 | 0.07 |
| 84 | 37.621 | Cedrol | C15H26O | 77-53-2 | 96.9 | 0.48 | 0.45 | 1.62 | 0.60 |
| 85 | 37.916 | Nonane, 2-methyl- | C10H22 | 871-83-0 | 79.2 | 0.03 | 0.00 | 0.08 | 0.00 |
| 86 | 38.259 | Octane, 1,1'-oxybis- | C16H34O | 629-82-3 | 96.9 | 0.13 | 0.21 | 0.34 | 1.67 |
| 87 | 38.788 | Hexanoic acid, 3,5,5-trimethyl-, nonyl ester | C18H36O2 | 1000406-06-0 | 75.9 | 0.13 | 0.42 | 0.46 | 5.19 |
| 88 | 38.926 | Heptadecane, 2-methyl- | C18H38 | 1560-89-0 | 80.1 | 0.15 | 0.00 | 0.00 | 0.00 |
| 89 | 38.990 | Decane, 2,4-dimethyl- | C12H26 | 2801-84-5 | 74.9 | 0.07 | 0.00 | 0.08 | 0.00 |
| 90 | 40.710 | 3-Ethyl-2,6,10-trimethylundecane | C16H34 | 1000432-25-9 | 89.6 | 0.05 | 0.05 | 0.07 | 0.00 |
| 91 | 40.971 | Isopropyl myristate | C17H34O2 | 110-27-0 | 74.0 | 0.00 | 0.00 | 0.12 | 0.07 |
